1 **Multifactorial Chromosomal Variants Regulate Polymyxin Resistance in Extensively Drug-**  
2 **Resistant *Klebsiella pneumoniae***

3

4

5 Miranda E Pitt<sup>1</sup>, Alysha G Elliott<sup>1</sup>, Minh Duc Cao<sup>1</sup>, Devika Ganesamoorthy<sup>1</sup>, Ilias Karaiskos<sup>2</sup>,  
6 Helen Giamarellou<sup>2</sup>, Cely S Abboud<sup>3</sup>, Mark AT Blaskovich<sup>1</sup>, Matthew A Cooper<sup>1\*</sup> and Lachlan  
7 Coin<sup>1\*</sup>

8

9 <sup>1</sup>Institute for Molecular Bioscience, University of Queensland, Brisbane, Australia

10 <sup>2</sup>6<sup>th</sup> Department of Internal Medicine, Hygeia General Hospital, Athens, Greece

11 <sup>3</sup>Instituto Dante Pazzanese de Cardiologia, São Paulo, Brazil

12

13 Running Title: Polymyxin Resistance in XDR *K. pneumoniae*

14

15 \*Address correspondence to authors: Matthew A Cooper ([m.cooper@uq.edu.au](mailto:m.cooper@uq.edu.au)) & Lachlan Coin  
16 ([l.coin@imb.uq.edu.au](mailto:l.coin@imb.uq.edu.au))

17

18

19

20

21

22

23

24 **SYNOPSIS**

25 **Objectives:** Infections facilitated by extensively drug-resistant *Klebsiella pneumoniae* (XDR-KP)  
26 cause high mortality and are disseminating globally. Identifying the genetic basis underpinning  
27 resistance allows for rapid diagnosis and treatment.

28 **Methods:** XDR isolates sourced from Greece and Brazil, including nineteen polymyxin-resistant  
29 and five polymyxin-susceptible strains, underwent whole genome sequencing.

30 **Results:** Approximately 90% of polymyxin resistance was enabled by alterations upstream or  
31 within *mgrB*. The most common mutation identified was an insertion at nucleotide position 75 in  
32 *mgrB* via an *ISKpn26*-like element in the ST258 lineage and *ISKpn13* in one ST11 isolate. Three  
33 strains acquired an *IS1* element upstream of *mgrB* and another strain had an *ISKpn25* insertion at  
34 133 bp. Other isolates had truncations (C28STOP, Q30STOP) or a missense mutation (D31E)  
35 affecting *mgrB*. Complementation assays revealed all *mgrB* perturbations contributed to  
36 resistance. Missense mutations in *phoQ* (T281M, G385C) were also found to facilitate resistance.  
37 Several variants in *phoPQ* co-segregating with the *ISKpn26*-like insertion were identified as partial  
38 suppressor mutations. Three ST258 samples were found to contain subpopulations with different  
39 resistance conferring mutations, including the *ISKpn26*-like insertion colonising with a novel  
40 mutation in *pmrB* (P158R), both confirmed via complementation assays. We also characterized a  
41 new multi-drug resistant *Klebsiella quasipneumoniae* strain ST2401 which was susceptible to  
42 polymyxins.

43 **Conclusions:** These findings highlight the broad spectrum of chromosomal modifications which  
44 can facilitate and regulate resistance against polymyxins in KP.

45

## 46 INTRODUCTION

47 *Klebsiella pneumoniae* (KP) strains classified as extensively drug-resistant (XDR) are  
48 rapidly emerging due to the dissemination of aminoglycoside,  $\beta$ -lactam, fluoroquinolone and  
49 carbapenem plasmid-encoded resistance genes. <sup>1</sup> Notably, carbapenem-resistant KP (KPC) have  
50 been linked to high morbidity and an overall mortality of 48% in infected patients. <sup>2</sup> Polymyxin B  
51 and colistin (polymyxin E) are now one of the last viable therapeutic options. <sup>3</sup> Unfortunately,  
52 resistance to this last line antibiotic class is an increasing global burden, with high prevalence  
53 reported in Asia (Korea <sup>4,5</sup>, India <sup>6,7</sup>), Europe (Greece <sup>8,10</sup>), Italy <sup>10,11</sup>) and Latin America (Brazil  
54 <sup>12,13</sup>). Depending on early detection, mortality associated with polymyxin-resistant KP infections  
55 ranges from 20 to 100%. <sup>14</sup>

56 Polymyxins infiltrate Gram-negative bacteria via initial binding to the basal component of  
57 lipopolysaccharide, lipid A. This causes the displacement of  $Mg^{2+}$  and  $Ca^{2+}$ , disrupting bacterial  
58 outer membrane integrity and allowing the polymyxins to enter and act on intracellular targets. An  
59 extended exposure in KP triggers the activation of the two-component regulatory systems, PmrAB  
60 and PhoPQ. <sup>15-17</sup> This pathway modulates *pmrC* and the *pmrHFJKLM* operon facilitating the  
61 addition of phosphoethanolamine (pEtN) and/ or 4-amino-4-deoxy-L-arabinose (L-Ara4N) to lipid  
62 A phosphate groups, impairing polymyxin binding interactions. <sup>18-20</sup> Disruption of *mgrB*, the  
63 negative regulator of PhoPQ, has been commonly observed in isolates of clinical origin. <sup>8,21</sup> This  
64 constitutive up-regulation incurs no apparent fitness cost and appears to be stable, with minimal  
65 reports of reversions. <sup>22,23</sup> Heteroresistant populations, where only a subset of bacteria are resistant,  
66 are prevalent in KP which complicates diagnosis. <sup>24</sup> This situation is further exacerbated by the  
67 recently reported plasmid gene *mcr-1*, which encodes a pEtN transferase enzyme <sup>25</sup> and  
68 identification of pandrug-resistant KP. <sup>26</sup>

69           This study aimed to investigate XDR-KP clinical isolates arising in Greece and Brazil  
70 during 2012 to 2014 to identify and validate genetic variants contributing to resistance. These  
71 alterations were further compared to prior clinical isolates to decipher if these mutations have been  
72 previously detected.

73

74

75

76

77

78

79

80

81

82

83

84

85

86

87

88

89

90

91

## 92 MATERIALS AND METHODS

### 93 Bacterial isolates

94 KP clinical isolates were acquired from Hygeia General Hospital, Athens, Greece and  
95 Instituto Dante Pazzanese de Cardiologia, Brazil from patients in 2012 to 2014. Cultures were  
96 supplied as stabs/slants or on agar, and were subsequently cultured in Nutrient Broth. Cultures  
97 were made to 20% glycerol and stored at -80 °C. When required for assay or extraction, glycerol  
98 stocks were struck out to obtain single colonies on either Nutrient Agar or Tryptic Soy Agar with  
99 5% defibrinated sheeps blood. Reference strains included *Escherichia coli* (ATCC 25922) and  
100 *Klebsiella spp.* (ATCC 13883, ATCC 700603, ATCC BAA-2146), which were obtained from the  
101 American Type Culture Collection (ATCC; Manassas, VA, USA).

### 102 Antimicrobial susceptibility assays

103 Species identification and susceptibility profiles of clinical isolates from Greece and Brazil  
104 were evaluated in the clinic using VITEK®2 (bioMérieux) and further validated at the Institute for  
105 Molecular Bioscience (IMB) (The University of Queensland, Australia) by determination of MICs  
106 using the standard Clinical & Laboratory Standards Institute (CLSI) approved broth microdilution  
107 (BMD) methods with Mueller Hinton Broth (MHB). Resistance was determined as per The  
108 European Committee on Antimicrobial Susceptibility Testing (EUCAST) (Version 5.0, 2015) (see  
109 <http://www.eucast.org>). The break point for tetracycline was in concordance to CLSI guidelines.  
110 <sup>27</sup> Categorisation of drug resistance level was determined through guidelines previously outlined.

111 <sup>28</sup>

112

113

114

## 115 **DNA extraction**

116 DNA was extracted from overnight cultures using the DNeasy Blood and Tissue Kit  
117 (Qiagen) with the additional enzymatic lysis buffer pre-treatment as per manufacturer's  
118 instructions. DNA was quantified with Qubit®3.0 (ThermoFisher Scientific).

## 119 **DNA library preparation and sequencing**

120 Library preparation was accomplished using the Nextera XT kit (Illumina) with 1 ng input  
121 of DNA as per manufacturer's instructions. Quality of libraries were checked using a 2100  
122 Bioanalyzer (Agilent Technologies). Libraries were sequenced on an Illumina MiSeq with 300 bp  
123 paired end sequencing reads and >100X coverage per sample.

## 124 **Sequencing analysis**

125 Paired end reads were trimmed with Trimmomatic<sup>29</sup> and assembled using SPAdes.<sup>30</sup> The  
126 Rapid Annotation using Subsystem Technology (RAST) was utilised to annotate assembled  
127 genomes.<sup>31</sup> Assemblies were also uploaded to the Centre for Genomic Epidemiology (CGE) to  
128 identify STs (MultiLocus Sequence Typing Server 1.8<sup>32</sup>) and acquired resistance which included  
129 *mcr-1* detection (ResFinder 2.1<sup>33</sup>). Phylogroups of STs were established by constructing a  
130 phylogenetic tree along with 117 KP STs as reported previously.<sup>34</sup> The 7 MLST defining loci  
131 were aligned with MUSCLE<sup>35</sup> and used to build a tree using Neighbour-Joining implemented in  
132 MEGA6.<sup>36</sup>

## 133 **Variant detection**

134 Alterations both in and flanking the genes *pmrA*, *pmrB*, *phoP*, *phoQ* and *mgrB* were  
135 examined and sequence reads of all strains were aligned to the assembly of 20\_GR\_12, a  
136 polymyxin-susceptible ST258 strain with the least number of contigs, using BWA-MEM.<sup>37</sup> The  
137 alignment was analysed through FreeBayes<sup>38</sup> to identify single nucleotide and small indel

138 variation, using a diploid analysis in order to identify potential heterogeneity. Sites with more than  
139 20% of reads mapping to the minor allele were considered potentially heterogeneous. The effects  
140 of variations were determined by snpEff.<sup>39</sup> The impact on protein sequence was further confirmed  
141 by the Protein Variation Effect Analyzer (PROVEAN).<sup>40</sup> For the analysis of large chromosome  
142 changes, the gene sequences including 300 bp flanking were extracted from the assemblies. A  
143 multiple alignment of each gene was constructed from the pair-wise alignment to the longest gene  
144 sequence.

#### 145 **Insertion sequence element validation**

146 ISFinder<sup>41</sup> was used for the identification of IS elements. To confirm disruptive IS  
147 elements, *mgrB* was amplified with primers displayed in Table S1 via 2X Phusion HF master mix  
148 (Invitrogen) under the following cycling conditions: 98 °C 10 seconds, 50 °C 30 seconds and 72  
149 °C 60 seconds (35X). Amplicons were examined using Sanger Sequencing, aligned through  
150 Clustal Omega<sup>42</sup> and a tree constructed as described above.

#### 151 **Complementation assays**

152 Contribution of variants to resistance were validated through complementation assays as  
153 previously described.<sup>43</sup> Briefly, genes (Table S1) were amplified from a polymyxin-susceptible  
154 isolate, 20\_GR\_12, and cloned into the pCR-BluntII-TOPO vector via the Zero Blunt TOPO PCR  
155 cloning kit (Invitrogen). Chemically competent *E. coli* TOP10 cells were transformed and selected  
156 by the addition of 50 mg/L kanamycin in MHB agar. Isolation of plasmids were via the PureLink™  
157 Quick Plasmid Miniprep Kit (Invitrogen) and transformed into KP strains via electroporation (25  
158 μF, 200 Ω, 1.25 kV/cm) with a Gene Pulser (Bio-Rad Laboratories). Selection was accomplished  
159 through supplementation of ≥500 mg/L zeocin in MHB agar plates. Transformed colonies (n=≥2)  
160 were acquired and placed in MHB containing 1500 mg/L zeocin and 1 mM isopropyl β-D-1-

161 thiogalactopyranoside (Sigma Aldrich). If polymyxin susceptibility was not restored upon  
162 complementation, genes harbouring mutations were further amplified and introduced into  
163 20\_GR\_12. To discern the impact of additional mutations in *phoPQ* and *pmrB* segregating with  
164 disrupted *mgrB*, mutant genes were introduced into a polymyxin-resistant isolate only harbouring  
165 an IS element *mgrB* disruption, 7\_GR\_13. Controls included transformation of WT genes into  
166 20\_GR\_12, sequencing of amplicon prior to incision in vector and KP transformed strains  
167 undergoing a plasmid extraction and further PCR of the multiple cloning site. Antimicrobial testing  
168 against polymyxin B were conducted as above however, using cation-adjusted MHB.

#### 169 **Nucleotide sequence accession numbers**

170       The nucleotide sequences obtained in this study have been deposited under BioProject  
171 PRJNA307517.

172

173

174

175

176

177

178

179

180

181



## 182 RESULTS

### 183 Characterisation of clinical isolates

184 KP isolates were all characterised in the hospital microbiology facility using VITEK®  
185 (Table 1). Subtle variations were detected between VITEK and broth microdilution (BMD) results  
186 (Table S2), predominantly the level of resistance towards gentamicin, tetracycline and tigecycline.  
187 A major dissimilarity was polymyxin susceptibility in 6\_GR\_12 (sensitive in BMD, resistant in  
188 VITEK) and resistant in 23\_GR\_13 (resistant in BMD, sensitive in VITEK). Polymyxin resistance  
189 was identified in 19 of the isolates. An abundance of acquired resistance genes (Table 2) were  
190 detected and this presence corresponded to the antimicrobial testing phenotype. This analysis did  
191 not identify *mcr-1* in these strains. Only 18\_GR\_14 and 19\_GR\_14 were not identified as  
192 extended-spectrum beta-lactamase producers amongst the polymyxin-resistant strains.  
193 Consequently, all polymyxin-resistant strains harboured non-susceptibility to at least one  
194 antibiotic in 14 or more of the 16 antimicrobial categories hence were defined as XDR.

### 195 Sequence type determination

196 Two thirds of the Greece clinical strains were found to belong to ST258 and the remaining  
197 were ST11, ST147 or ST383 (Table 1). While 5\_GR\_13 and 6\_GR\_12 were both ST383, only  
198 5\_GR\_13 was resistant to polymyxin. Among the two strains from Brazil, 11\_BR\_13 was ST437  
199 and 12\_BR\_13 was ST11. 21\_GR\_13 had a profile previously undefined and has been newly  
200 designated ST2401. Clustering analysis further revealed this multidrug-resistant polymyxin-  
201 susceptible strain as *Klebsiella quasipneumoniae* (KQ) (Figure S1).

### 202 MgrB disruption

203 In approximately 90% of strains, *mgrB* was impacted either by missense mutations,  
204 nonsense mutations or insertion sequence (IS) elements (Table 3). Both 5\_GR\_13 and 19\_GR\_14

205 harboured a truncation while an amino acid change, D31E, was apparent in 3\_GR\_13. IS element  
206 disruption was prevalent in 53% of strains and commonly an IS5-like element was integrated at  
207 nucleotide position 75 (Figure S2). Sequencing revealed this element was closely related to  
208 IS*Kpn26*, herein known as IS*Kpn26*-like, except for 12\_BR\_13 which matched IS*Kpn13* (Figure  
209 1). IS*IR* was detected upstream of *mgrB* in 11\_BR\_13 and an IS*IR*-like (A>C, 393 bp; C>T, 396  
210 bp) element in 16\_GR\_13 and 17\_GR\_14. Strain 15\_GR\_13 had a deletion of the *mgrB* locus from  
211 nucleotide position 133 onwards. The 127 bp flanking region mapped to IS*Kpn25* with the  
212 transposase in the same orientation as *mgrB*. All 3 of IS*I* element insertions, but only one of the 8  
213 IS*Kpn26*-like element insertions had their transposases in the same orientation as *mgrB*.

#### 214 **Single, multiple and heterogeneous mutations**

215 Aberrations in genes commonly identified to confer polymyxin resistance in KP include  
216 *mgrB*, *phoPQ* and *pmrAB*. Several non-synonymous mutations were identified across the isolates,  
217 however, not all were predicted to be deleterious (Table S3). ST383 contained several mutations  
218 in *pmrA* and *pmrB* although only Q30STOP in polymyxin-resistant 5\_GR\_13 was predicted to  
219 have an impact. Similarly, neutral changes in all four of these genes were detected in polymyxin-  
220 susceptible KQ strains ATCC 700603 and 21\_GR\_13. 8\_GR\_13 and 9\_GR\_12 harboured a single  
221 detrimental missense mutation in *phoQ*. Alterations in *mgrB* were accompanied by one or more  
222 missense mutations in *phoP*, *phoQ* and/ or *pmrB*. Predicted deleterious variants segregating with  
223 disrupted *mgrB* included *pmrB* (T140P, P158R), *phoP* (P74L, A95S) and *phoQ* (N253T, V446G),  
224 which were commonly in the ST258 lineage. V446G (*phoQ*) and P158R (*pmrB*) were  
225 heterogeneous in 13\_GR\_14 (65, 66% variant allele frequency) and 14\_GR\_14 (52, 57% variant  
226 allele frequency). Assembly revealed 23\_GR\_12 harboured an IS*Kpn26*-like disrupted *mgrB*  
227 alongside the intact version with alterations in *phoP* and *phoQ* in 57% of the sample.

## 228 **Role of *mgrB* disruptions and presence of heteroresistance via complementation assays**

229 Complementation of the WT gene elucidated the role of these mutations in resistance  
230 (Table 3). Introduction of pTOPO-*mgrB* restored susceptibility in all resistant isolates with *mgrB*  
231 coding mutations or upstream disruptions, with the exception of two strains heterogeneous for the  
232 *mgrB* disruption and a *pmrB* coding mutation (13\_GR\_14 and 14\_GR\_14). For these two strains,  
233 pTOPO-*mgrB* restored susceptibility in zero of three 13\_GR\_14 colonies and one of three  
234 14\_GR\_14 colonies. Transformation of 1 out of 3 colonies for both 13\_GR\_14 and 14\_GR\_14  
235 strains with pTOPO-*pmrB* restored susceptibility and *mgrB* amplification of these colonies  
236 revealed an intact *mgrB* locus (data not shown). This indicates that the mutation in *pmrB* (P158R)  
237 is conferring resistance to polymyxin and coexisting with the *mgrB* disrupted population.  
238 23\_GR\_12 was also observed to have a heterogeneous *mgrB* disruption but did not carry a  
239 corresponding *pmrB* mutation however, harboured similar mutations to 2\_GR\_12 in *phoPQ*.  
240 Amplification of *mgrB* identified two of three 23\_GR\_12 transformed colonies contained the IS  
241 element disruption and were reverted to susceptible upon complementation with pTOPO-*mgrB*.

## 242 **Validation of resistance conferring mutations in *phoQ***

243 Strains 8\_GR\_13 and 9\_GR\_12 harboured a single mutation in *phoQ* potentially conferring  
244 resistance (Table 3). When these isolates were transformed with pTOPO-*phoQ*, results remained  
245 variable where a lack of growth was present in a susceptible range (MIC:  $\leq 2$  mg/L) however,  
246 several wells containing high PMB concentrations exhibited growth. To resolve this, the mutated  
247 gene was introduced into a polymyxin-susceptible isolate, 20\_GR\_12, and resistance was  
248 apparent.

249

250

## 251 **Identification of suppressor mutations in *phoPQ***

252           Several mutations co-segregating with disrupted *mgrB* were detected including *phoP*  
253 (P74L, A95S), *phoQ* (N253T, V446G) and *pmrB* (T140P). Complementation of WT genes in these  
254 isolates commonly facilitated a  $\geq 2$ -fold increase in MIC with the exception of 10\_GR\_13, which  
255 had an additional predicted neutral mutation in *phoQ* (A225T) (Table S2). To evaluate the potential  
256 influence of these mutations on polymyxin resistance, mutated genes were placed into a strain only  
257 containing the *mgrB* IS element disruption, 7\_GR\_13. Complementation of the mutant *phoQ*  
258 (N253T) decreased the MIC by 2-fold (Table 3), confirming the role of this mutation as a resistance  
259 suppressor. Initially, the *phoQ* (V446G) mutation was anticipated to segregate with the *mgrB*  
260 disrupted population in 13\_GR\_14 and 14\_GR\_14 as a suppressor mutation however, when *phoQ*  
261 was amplified from a colony reverted to susceptible via pTOPO-*mgrB* complementation, the WT  
262 *phoQ* was observed (Figure S3). The *phoQ* (V446G) mutation was successfully amplified from a  
263 14\_GR\_14 colony containing the *pmrB* (T158R) mutation and upon complementation in  
264 7\_GR\_13, resulted in a 2-fold reduction in MIC. Although this mutation did not segregate with  
265 disrupted *mgrB*, it may act as a partial suppressor mutation when a resistance conferring mutation  
266 is present in *pmrB*. Mutations in *phoP* (P74L, A95S) reduced the MIC in 7\_GR\_13 by  $\geq 8$ -fold  
267 which also identifies these as partial suppressor mutations. Complementation of mutant *pmrB*  
268 (T140P) into 7\_GR\_13 did not lead to an observable corresponding reduction in MIC however,  
269 once transformed into 20\_GR\_12, a 2-fold increase in MIC was apparent implying this is not a  
270 suppressor mutation.

271

272

273

## 274 DISCUSSION

275 Polymyxin resistance in XDR-KP is of grave concern, especially the alarming increase  
276 reported in Greece and Brazil.<sup>10, 12-14, 44</sup> We evaluated the genetic basis of polymyxin resistance in  
277 a series of Greek and Brazilian clinical isolates from patients in 2012 to 2014 and found alterations  
278 in genes *mgrB*, *phoPQ* and *pmrAB*.

279 Inactivation of *mgrB* was highly prevalent in these strains with an *ISKpn26*-like element  
280 being the predominant cause of resistance, as indicated by complementation restoring  
281 susceptibility in all isolates. Several other studies have observed an IS5-like element integration  
282 in the same position, including reports from Greece, Italy, France, Turkey and Colombia.<sup>8,9,45,46</sup>  
283 The *ISKpn26*-like element resembled the same sequence from Greece isolates previously  
284 described.<sup>46</sup> We identified that this mutation still persisted in 2014, after being first detected in  
285 2012.<sup>9</sup> The *ISKpn26*-like forward insertion at nucleotide 75 in ST147, *ISKpn13* integration at  
286 nucleotide 75 in ST11 and the potential *mgrB* disruption with *ISKpn25* was not previously  
287 reported. We identified *ISIR* or *ISIR*-like elements positioned upstream of *mgrB* in 3 isolates  
288 (11\_BR\_13, 16\_GR\_13, 17\_GR\_14) which were reverted upon complementation indicating an  
289 impact on the promoter region.

290 Truncations identified at position 28 and 30 of *mgrB* have also been previously detected,  
291 although these were identified in differing STs indicating mutations potentially have arisen  
292 independently in Greece.<sup>21</sup> Complementation of these changes had not previously been conducted  
293 and with our study now providing definitive evidence that these mutations to cause resistance. This  
294 study further identified that the amino acid change D31E in 3\_GR\_13 is a polymyxin resistance  
295 conferring change. These findings support the notion that intact MgrB is required to confer  
296 negative feedback on PhoPQ.<sup>8</sup>

297           Single predicted detrimental mutations were observed in the *phoQ* histidine kinase region,  
298 critical for phosphorylation and interaction with *phoP*, in 8\_GR\_13 (G385C) and 9\_GR\_12  
299 (T281M). The G385C mutation had been detected<sup>21</sup> however, in a differing ST. Complementation  
300 revealed an inconsistent MIC for these strains, although when a polymyxin-susceptible isolate was  
301 transformed with the mutated gene, full resistance was restored. Dominance of mutated *phoQ* has  
302 recently been highlighted and these results may imply the inability of pTOPO-*phoQ* to override  
303 the resistance caused by these mutations.<sup>47</sup>

304           Several non-synonymous changes were identified to be not deleterious according to  
305 PROVEAN analysis. Notably, these were abundant in KQ strains ATCC 700603<sup>48</sup> and  
306 21\_GR\_13. This was further identified in KP ST383 lineages and PROVEAN accurately detected  
307 these neutral changes. However, this does not negate the possibility of previously resistance  
308 conferring alterations being acquired in these loci with subsequent reversion mutations to give rise  
309 to a susceptible phenotype.

310           Heterogeneity was apparent in several isolates. In near equal ratios, 13\_GR\_14 and  
311 14\_GR\_14 possessed the IS*Kpn26*-like *mgrB* disruption and a new alteration conferring resistance  
312 in *pmrB*, P158R as determined by complementation. 23\_GR\_12 consisted of approximately half  
313 the reads mapping to the undisrupted genes and the other to the IS*Kpn26*-like strain with several  
314 additional predicted deleterious mutations. This heterogeneity may explain the initial clinical  
315 detection for this isolate to be polymyxin-susceptible.

316           Several isolates harbouring IS*Kpn26*-like element disrupted *mgrB* were accompanied by  
317 mutations in *phoP*, *phoQ* and/ or *pmrB*. These changes were present in  $\geq 98\%$  of reads to render  
318 the involvement of heterogeneity unlikely. Once complemented, an increase in resistance was  
319 commonly recorded. This potentially reflects partial suppressor mutations as strains which solely

320 possessed this IS element disruption commonly exhibited a heightened MIC of  $\geq 64$  mg/L. Once  
321 these mutations were introduced into a strain only harbouring the *mgrB* disruption, a reduction in  
322 MIC was apparent especially for *phoP* and *phoQ*. The involvement of additional mutations in  
323 PhoPQ to influence the level of polymyxin resistance has yet to be reported in KP. Previous  
324 research by Miller *et al*<sup>49</sup> determined additional mutations in PhoPQ alters polymyxin resistance  
325 in *Pseudomonas aeruginosa*. This prior study describes *phoP* mutations with the capacity to  
326 partially or fully suppress resistance causing mutations in *phoQ*. These mutations in *phoP* were  
327 near or within the DNA binding site which differs to our results where the alterations are impacting  
328 the response regulatory region that interacts with PhoQ. Conversely, all mutations partially  
329 suppressing the MIC were identified to be targeting the HAMP and histidine kinase component  
330 of PhoQ. These were in regions similar to revertant *P. aeruginosa* strains identified by Lee and  
331 Kwan.<sup>50</sup> We postulate these mutations are perturbing the critical transfer of phosphoryl groups  
332 from the histidine kinase of PhoQ to PhoP and subsequent *pmrD* expression. Whether these  
333 mutations constitute to a fitness advantage due to the reduction of metabolism required for the  
334 production of LPS modifications is yet to be discerned.

335 Interestingly, the *pmrB* T140P had formerly been identified in an ST258 lineage but even  
336 when the resistant gene was complemented, the MIC increased by 2-fold but was not defined as  
337 clinically resistant.<sup>21,51</sup> When this mutation was introduced into a strain with only the disrupted  
338 *mgrB*, an elevation in MIC was witnessed, however, the original MIC for this isolate is 8-fold  
339 lower. This may suggest the presence of additional suppressor mutations in other yet to be  
340 identified loci.

341

342

343           Rapid and accurate detection of mutations attributed to polymyxin resistance remains a  
344 longstanding burden. Our research has contributed to the current understanding of the  
345 dissemination and evolution of this resistance in KP. This study highlights several issues of solely  
346 interrogating genomes for resistance detection including ST specific non-synonymous changes,  
347 heterogeneity and provides the first report of suppressor mutations. Through complementation  
348 assays, we have discerned the role of these modifications and have identified resistance-causing  
349 alterations for future genome-based diagnostics.

350

351

352

353

354

355

356

357

358

359

360

361

362

363

364



365 **ACKNOWLEDGEMENTS**

366 We thank Dr Aurélie Jayol and Professor Patrice Nordmann for providing their  
367 complementation assay methodology. The authors thank Angela M. Kavanagh for technical  
368 support with susceptibility assays. We acknowledge the sequencing services provided by the  
369 Australian Genome Research Facility. We thank the team of the curators of the Institut Pasteur  
370 MLST system (Paris, France) for importing novel alleles, profiles and/or isolates at  
371 <http://bigsd.db.web.pasteur.fr>.

372 **Funding**

373 LC is an ARC Future Fellow (FT110100972). MAC is an NHMRC Principal Research  
374 Fellow (APP1059354). MEP is an Australian Postgraduate Award scholar. AGE and MATB are  
375 supported in part by a Wellcome Trust Strategic Award 104797/Z/14/Z. Research was supported  
376 by NHMRC grants (APP1005350, APP1045326), NIH grant (R21AI098731/R33AI098731) and  
377 AID sequencing Grant (2013) as well as funding from the Institute for Molecular Bioscience  
378 Centre for Superbug Solutions (610246).

379 **Transparency declarations**

380 None to declare.

381 **Author Contributions**

382 AGE, LC, MAC, MATB conceived the study. MEP, AGE, MDC, DG performed the  
383 experiments and analysed the data. MEP and MDC performed the sequencing analysis. IK, HG,  
384 CSA provided the bacterial isolates, clinical information on the strains and clinical perspective in  
385 writing the paper. MEP wrote the paper with input from all authors.

386

387

388 **REFERENCES**

- 389 1. Ramirez MS, Traglia GM, Lin DL *et al.* Plasmid-Mediated Antibiotic Resistance and  
390 Virulence in Gram-Negatives: the *Klebsiella pneumoniae* Paradigm. *Microbiol Spectr*  
391 2014; **2**: 1-15.
- 392 2. Patel G, Huprikar S, Factor SH *et al.* Outcomes of carbapenem-resistant *Klebsiella*  
393 *pneumoniae* infection and the impact of antimicrobial and adjunctive therapies. *Infect*  
394 *Control Hosp Epidemiol* 2008; **29**:1099-106.
- 395 3. Biswas S, Brunel JM, Dubus JC *et al.* Colistin: an update on the antibiotic of the 21st  
396 century. *Expert Rev Anti Infect Ther* 2012; **10**: 917-34.
- 397 4. Suh JY, Son JS, Chung DR *et al.* Nonclonal emergence of colistin-resistant *Klebsiella*  
398 *pneumoniae* isolates from blood samples in South Korea. *Antimicrob Agents Chemother*  
399 2010; **54**: 560-62.
- 400 5. Kim SY, Shin J, Shin S *et al.* Characteristics of carbapenem-resistant *Enterobacteriaceae*  
401 isolates from Korea. *Diagn Microbiol Infect Dis* 2013; **76**: 486-90.
- 402 6. Mohamudha Parveen R, Harish BN *et al.* Emerging carbapenem resistance among  
403 nosocomial isolates of *Klebsiella pneumoniae* in South India. *International Journal of*  
404 *Pharma and Bio Sciences* 2010; **1**: 1-11.
- 405 7. Goel G, Hmar L, Sarkar De M *et al.* Colistin-resistant *Klebsiella pneumoniae*: report of a  
406 cluster of 24 cases from a new oncology center in eastern India. *Infect Control Hosp*  
407 *Epidemiol* 2014; **35**: 1076-7.
- 408 8. Cannatelli A, Giani T, D'Andrea MM *et al.* MgrB inactivation is a common mechanism of  
409 colistin resistance in KPC-producing *Klebsiella pneumoniae* of clinical origin. *Antimicrob*  
410 *Agents Chemother* 2014; **58**: 5696-703.

- 411 9. Mavroidi A, Katsiari M, Likousi S *et al.* Characterization of ST258 Colistin-Resistant,  
412 blaKPC-Producing *Klebsiella pneumoniae* in a Greek Hospital. *Microb Drug Resist* 2016;  
413 **22**: 392-8.
- 414 10. Giamarellou H. Epidemiology of infections caused by polymyxin-resistant pathogens. *Int*  
415 *J Antimicrob Agents* 2016; **48**: 614-21.
- 416 11. Monaco M, Giani T, Raffone M *et al.* Colistin resistance superimposed to endemic  
417 carbapenem-resistant *Klebsiella pneumoniae*: a rapidly evolving problem in Italy,  
418 November 2013 to April 2014. *Euro Surveill* 2014; **19**: pii=20939.
- 419 12. Pereira GH, Garcia DO, Mostardeiro M *et al.* Outbreak of carbapenem-resistant *Klebsiella*  
420 *pneumoniae*: two-year epidemiologic follow-up in a tertiary hospital. *Mem Inst Oswaldo*  
421 *Cruz* 2013; **108**: 113-5.
- 422 13. Gaspar GG, Bellissimo-Rodrigues F, Andrade LN *et al.* Induction and nosocomial  
423 dissemination of carbapenem and polymyxin-resistant *Klebsiella pneumoniae*. *Rev Soc*  
424 *Bras Med Trop* 2015; **48**: 483-7.
- 425 14. Ah YM, Kim AJ, Lee JY. Colistin resistance in *Klebsiella pneumoniae*. *Int J Antimicrob*  
426 *Agents* 2014; **44**: 8-15.
- 427 15. Groisman EA, Kayser J, Soncini FC. Regulation of polymyxin resistance and adaptation  
428 to low-Mg<sup>2+</sup> environments. *J Bacteriol* 1997; **179**: 7040-5.
- 429 16. Velkov T, Thompson PE, Nation RL *et al.* Structure-activity relationships of polymyxin  
430 antibiotics. *J Med Chem* 2010; **53**:1898-916.
- 431 17. Cheng HY, Chen YF, Peng HL. Molecular characterization of the PhoPQ-PmrD-PmrAB  
432 mediated pathway regulating polymyxin B resistance in *Klebsiella pneumoniae* CG43. *J*  
433 *Biomed Sci* 2010; **17**: 60.

- 434 18. Helander IM, Kato Y, Kilpelainen I *et al.* Characterization of lipopolysaccharides of  
435 polymyxin-resistant and polymyxin-sensitive *Klebsiella pneumoniae* O3. *Eur J Biochem*  
436 1996; **237**:272-8.
- 437 19. Velkov T, Deris ZZ, Huang JX *et al.* Surface changes and polymyxin interactions with a  
438 resistant strain of *Klebsiella pneumoniae*. *Innate Immun* 2014; **20**: 350-63.
- 439 20. Wright MS, Suzuki Y, Jones MB *et al.* Genomic and transcriptomic analyses of colistin-  
440 resistant clinical isolates of *Klebsiella pneumoniae* reveal multiple pathways of resistance.  
441 *Antimicrob Agents Chemother* 2015; **59**:536-43.
- 442 21. Olaitan AO, Diene SM, Kempf M *et al.* Worldwide emergence of colistin resistance in  
443 *Klebsiella pneumoniae* from healthy humans and patients in Lao PDR, Thailand, Israel,  
444 Nigeria and France owing to inactivation of the PhoP/PhoQ regulator *mgrB*: an  
445 epidemiological and molecular study. *Int J Antimicrob Agents* 2014; **44**: 500-7.
- 446 22. Arena F, De Angelis LH, Cannatelli A *et al.* Colistin resistance caused by inactivation of  
447 the MgrB regulator is not associated with decreased virulence of ST258 KPC  
448 carbapenemase-producing *Klebsiella pneumoniae*. *Antimicrob Agents Chemother* 2016;  
449 **60**: 2509-12.
- 450 23. Lee JY, Choi MJ, Choi HJ *et al.* Preservation of Acquired Colistin Resistance in Gram-  
451 Negative Bacteria. *Antimicrob Agents Chemother* 2015; **60**: 609-12.
- 452 24. Meletis G, Tzampaz E, Sianou E *et al.* Colistin heteroresistance in carbapenemase-  
453 producing *Klebsiella pneumoniae*. *J Antimicrob Chemother* 2011; **66**: 946-7.
- 454 25. Liu YY, Wang Y, Walsh TR *et al.* Emergence of plasmid-mediated colistin resistance  
455 mechanism MCR-1 in animals and human beings in China: a microbiological and  
456 molecular biological study. *Lancet Infect Dis* 2016; **16**: 161-8.

- 457 26. Zowawi HM, Forde BM, Alfaresi M *et al.* Stepwise evolution of pandrug-resistance in  
458 *Klebsiella pneumoniae*. *Sci Rep* 2015; **5**: 15082.
- 459 27. Clinical and Laboratory Standards Institute. *Methods for dilution antimicrobial*  
460 *susceptibility tests for bacteria that grow aerobically – Ninth Edition: Approved standard*  
461 *M07-A9*. CLSI, Wayne, PA, 2012
- 462 28. Magiorakos AP, Srinivasan A, Carey RB *et al.* Multidrug-resistant, extensively drug-  
463 resistant and pandrug-resistant bacteria: an international expert proposal for interim  
464 standard definitions for acquired resistance. *Clin Microbiol Infect* 2012; **18**: 268-81.
- 465 29. Bolger AM, Lohse M, Usadel B. Trimmomatic: a flexible trimmer for Illumina sequence  
466 data. *Bioinformatics* 2014; **30**: 2114-20.
- 467 30. Bankevich A, Nurk S, Antipov D *et al.* SPAdes: a new genome assembly algorithm and its  
468 applications to single-cell sequencing. *J Comput Biol* 2012; **19**: 455-77.
- 469 31. Overbeek R, Olson R, Pusch GD *et al.* The SEED and the Rapid Annotation of microbial  
470 genomes using Subsystems Technology (RAST). *Nucleic Acids Res* 2014; **42**: D206-14.
- 471 32. Larsen MV, Cosentino S, Rasmussen S *et al.* Multilocus sequence typing of total-genome-  
472 sequenced bacteria. *J Clin Microbiol* 2012; **50**: 1355-61.
- 473 33. Zankari E, Hasman H, Cosentino S *et al.* Identification of acquired antimicrobial resistance  
474 genes. *J Antimicrob Chemother* 2012; **67**: 2640-4.
- 475 34. Maatallah M, Vading M, Kabir MH *et al.* *Klebsiella variicola* is a frequent cause of  
476 bloodstream infection in the stockholm area, and associated with higher mortality  
477 compared to *K. pneumoniae*. *PLoS One* 2014; **9**: e113539.
- 478 35. Edgar RC. MUSCLE: multiple sequence alignment with high accuracy and high  
479 throughput. *Nucleic Acids Res* 2004; **32**: 1792-7.

- 480 36. Tamura K, Stecher G, Peterson D *et al.* MEGA6: Molecular Evolutionary Genetics  
481 Analysis version 6.0. *Mol Biol Evol* 2013; **30**: 2725-9.
- 482 37. Li H, Durbin R. Fast and accurate short read alignment with Burrows-Wheeler transform.  
483 *Bioinformatics* 2009; **25**: 1754-60.
- 484 38. Garrison E, Marth G. Haplotype-based variant detection from short-read sequencing. *arXiv*  
485 *preprint arXiv* 2012; 12073907.
- 486 39. Cingolani P, Platts A, Wang le L *et al.* A program for annotating and predicting the effects  
487 of single nucleotide polymorphisms, SnpEff: SNPs in the genome of *Drosophila*  
488 *melanogaster* strain w1118; iso-2; iso-3. *Fly (Austin)* 2012; **6**: 80-92.
- 489 40. Choi Y, Chan AP. PROVEAN web server: a tool to predict the functional effect of amino  
490 acid substitutions and indels. *Bioinformatics* 2015; **31**: 2745-7.
- 491 41. Siguier P, Perochon J, Lestrade L *et al.* ISfinder: the reference centre for bacterial insertion  
492 sequences. *Nucleic Acids Res* 2006; **34**: D32-6.
- 493 42. Sievers F, Wilm A, Dineen D *et al.* Fast, scalable generation of high-quality protein  
494 multiple sequence alignments using Clustal Omega. *Mol Syst Biol* 2011; **7**: 539.
- 495 43. Jayol A, Poirel L, Brink A *et al.* Resistance to colistin associated with a single amino acid  
496 change in protein PmrB among *Klebsiella pneumoniae* isolates of worldwide origin.  
497 *Antimicrob Agents Chemother* 2014; **58**: 4762-6.
- 498 44. Neonakis IK, Samonis G, Messaritakis H *et al.* Resistance status and evolution trends of  
499 *Klebsiella pneumoniae* isolates in a university hospital in Greece: ineffectiveness of  
500 carbapenems and increasing resistance to colistin. *Chemotherapy* 2010; **56**: 448-52.
- 501 45. Poirel L, Jayol A, Bontron S *et al.* The *mgrB* gene as a key target for acquired resistance  
502 to colistin in *Klebsiella pneumoniae*. *J Antimicrob Chemother* 2015; **70**: 75-80.

- 503 46. Cannatelli A, D'Andrea MM, Giani T *et al.* *In vivo* emergence of colistin resistance in  
504 *Klebsiella pneumoniae* producing KPC-type carbapenemases mediated by insertional  
505 inactivation of the PhoQ/PhoP *mgrB* regulator. *Antimicrob Agents Chemother* 2013; **57**:  
506 5521-6.
- 507 47. Halaby T, Kucukkose E, Janssen AB *et al.* Genomic characterization of colistin  
508 heteroresistance in *Klebsiella pneumoniae* during a nosocomial outbreak. *Antimicrob*  
509 *Agents Chemother* 2016; **60**: 6837-43.
- 510 48. Elliott AG, Ganesamoorthy D, Coin L *et al.* Complete Genome Sequence of *Klebsiella*  
511 *quasipneumoniae* subsp. *similipneumoniae* Strain ATCC 700603. *Genome Announc* 2016;  
512 **4**: e00438-16.
- 513 49. Miller AK, Brannon MK, Stevens L *et al.* PhoQ mutations promote lipid A modification  
514 and polymyxin resistance of *Pseudomonas aeruginosa* found in colistin-treated cystic  
515 fibrosis patients. *Antimicrob. Agents Chemother* 2011; **55**: 5761–9.
- 516 50. Lee JY, Ko KS. Mutations and expression of PmrAB and PhoPQ related with colistin  
517 resistance in *Pseudomonas aeruginosa* clinical isolates. *Diagn. Microbiol. Infect. Dis.*  
518 2014; **78**: 271–6.
- 519 51. Deleo FR, Chen L, Porcella SF *et al.* Molecular dissection of the evolution of carbapenem-  
520 resistant multilocus sequence type 258 *Klebsiella pneumoniae*. *Proc Natl Acad Sci U S A*  
521 2014; **111**: 4988-93.

522

523

524

525

526 **TABLE 1** Characteristics of *Klebsiella* clinical isolates in this study

527

528

529

530

531

532

533

534

535

536

537

538

539

540

541

542

| Strain ID <sup>a</sup> | Source              | MLST | Resistance Profile <sup>b</sup> |              |      |             |             |      |      |     |     |     |     |               |      |      |     |     |   |   |
|------------------------|---------------------|------|---------------------------------|--------------|------|-------------|-------------|------|------|-----|-----|-----|-----|---------------|------|------|-----|-----|---|---|
|                        |                     |      | AMG                             | AP $\beta$ I | CARB | CEPH<br>1/2 | CEPH<br>3/4 | CEPH | QUIN | FOL | GLY | MON | PEN | PEN $\beta$ I | PHEN | PHOS | POL | TET |   |   |
| 1_GR_13                | Stool               | 147  | R                               | R            | R    | R           | R           | R    | R    | R   | R   | R   | R   | R             | R    | R    | R   | R   | R | R |
| 2_GR_12                | Urine               | 258  | R                               | R            | R    | R           | R           | R    | R    | R   | R   | R   | R   | R             | R    | R    | S   | R   | R | R |
| 3_GR_13                | Sputum              | 258  | R                               | R            | R    | R           | R           | R    | R    | R   | R   | R   | R   | R             | R    | R    | R   | R   | R | R |
| 4_GR_12                | Blood               | 258  | R                               | R            | R    | R           | R           | R    | R    | R   | R   | R   | R   | R             | R    | R    | R   | R   | R | R |
| 5_GR_13                | Stool               | 383  | R                               | R            | R    | R           | R           | R    | R    | R   | R   | R   | R   | R             | R    | R    | R   | R   | R | R |
| 6_GR_12                | Stool               | 383  | R                               | R            | R    | R           | R           | R    | R    | R   | R   | R   | R   | R             | R    | R    | R   | R   | R | R |
| 7_GR_13                | Stool               | 258  | R                               | R            | R    | R           | R           | R    | R    | R   | R   | R   | R   | R             | R    | R    | R   | R   | R | R |
| 8_GR_13                | Stool               | 258  | R                               | R            | R    | R           | R           | R    | R    | R   | R   | R   | R   | R             | R    | R    | R   | R   | R | R |
| 9_GR_12                | Bronchial secretion | 258  | R                               | R            | R    | R           | R           | R    | R    | R   | R   | R   | R   | R             | R    | R    | R   | R   | R | R |
| 10_GR_13               | Blood               | 258  | R                               | R            | R    | R           | R           | R    | R    | R   | I   | R   | R   | R             | R    | R    | R   | R   | R | R |
| 11_BR_13               | Urine               | 437  | I                               | R            | R    | R           | R           | R    | R    | N   | I   | R   | R   | R             | N    | R    | R   | R   | N | N |
| 12_BR_13               | Secretion           | 11   | I                               | R            | R    | R           | R           | R    | R    | N   | R   | R   | R   | R             | N    | R    | R   | R   | R | N |
| 13_GR_14               | Bronchial secretion | 258  | R                               | R            | R    | R           | R           | R    | R    | R   | R   | R   | R   | R             | R    | R    | R   | R   | R | I |
| 14_GR_14               | Urine               | 258  | R                               | R            | R    | R           | R           | R    | R    | R   | R   | R   | R   | R             | R    | R    | R   | R   | R | R |
| 15_GR_13               | Stool               | 258  | R                               | R            | R    | R           | R           | R    | R    | R   | R   | R   | R   | R             | R    | R    | R   | R   | R | I |
| 16_GR_13               | Stool               | 11   | R                               | R            | R    | R           | R           | R    | R    | R   | I   | R   | R   | R             | R    | R    | R   | R   | R | R |
| 17_GR_14               | Stool               | 11   | R                               | R            | R    | R           | R           | R    | R    | R   | I   | R   | R   | R             | R    | R    | R   | R   | R | R |
| 18_GR_14               | Stool               | 258  | R                               | R            | R    | R           | R           | R    | R    | R   | I   | R   | R   | R             | R    | R    | R   | R   | R | I |
| 19_GR_14               | Stool               | 258  | R                               | R            | R    | R           | R           | R    | R    | R   | R   | R   | R   | R             | R    | R    | R   | R   | R | R |
| 20_GR_12               | Stool               | 258  | R                               | R            | R    | R           | R           | R    | R    | R   | R   | R   | R   | R             | R    | R    | R   | S   | R | R |
| 21_GR_13               | Urine               | 2401 | R                               | R            | R    | R           | R           | R    | R    | I   | R   | S   | R   | R             | R    | S    | S   | S   | S | S |
| 22_GR_12               | Sputum              | 258  | R                               | R            | R    | R           | R           | R    | R    | R   | I   | R   | R   | R             | R    | R    | I   | S   | I | I |
| 23_GR_12               | Stool               | 258  | R                               | R            | R    | R           | R           | R    | R    | R   | R   | R   | R   | R             | R    | R    | S   | S   | R | R |
| 24_GR_13               | Stool               | 258  | R                               | R            | R    | R           | R           | R    | R    | R   | R   | R   | R   | R             | R    | R    | R   | S   | R | R |



543 <sup>a</sup> Strain identification, numerical order catalogued at IMB\_Country (GR:Greece, BR:Brazil)\_last  
544 two digits of isolation year.

545 <sup>b</sup>Multilocus sequence type as identified through MultiLocus Sequence Typing Server 1.8.

546 <sup>c</sup>Antibiotic resistance as determined by VITEK®2 according to EUCAST guidelines (CLSI for  
547 tetracycline). Resistance called if identified for one antibiotic in class. AMG, Aminoglycosides;  
548 APβI, Antipseudomonal penicillins + β-lactamase inhibitors; CARB, Carbapenems; CEPH1/2,  
549 Non-extended spectrum cephalosporins (1<sup>st</sup> and 2<sup>nd</sup> generation); CEPH3/4, Extended-spectrum  
550 cephalosporins (3<sup>rd</sup> and 4<sup>th</sup> generation); CEPH, Cephameycins; QUIN, Fluoroquinolones; FOL,  
551 Folate pathway inhibitors; GLY, Glycylcyclines; MON, Monobactams; PEN, Penicillins; PENβI,  
552 Penicillins + β-lactamase inhibitors; PHEN, Phenicol; PHOS, Phosphonic acids; POL,  
553 Polymyxins; TET, Tetracyclines; **R**, Resistant; **I**, Intermediate; S, Susceptible; **N**, Not tested.

554

555

556

557

558

559

560

561

562

563

564

565



571 **TABLE 3** Complementation of WT genes from polymyxin-susceptible isolate 20\_GR\_12 into resistant strains and mutated genes  
 572 identified in resistant isolates also transformed into *mgrB* disrupted polymyxin-resistant strain 7\_GR\_13

| Strain ID         | MLST | Genotype <sup>a</sup>                                                                        | Polymyxin B MIC (mg/L) <sup>b</sup> |                 |      |             |       |             |       |       |       |             |       |              |     |
|-------------------|------|----------------------------------------------------------------------------------------------|-------------------------------------|-----------------|------|-------------|-------|-------------|-------|-------|-------|-------------|-------|--------------|-----|
|                   |      |                                                                                              | Initial                             | <i>mgrB</i>     |      | <i>phoP</i> |       | <i>phoQ</i> |       |       |       | <i>pmrB</i> |       |              |     |
|                   |      |                                                                                              |                                     | WT              | WT   | P74L        | A95S  | WT          | N253T | T281M | G385C | V446G       | WT    | T140P        |     |
| 1_GR_13           | 147  | <i>mgrB</i> (N25ΔISKpn26-like <sup>F</sup> ),<br><i>pmrB</i> (T140P)                         | 8-16                                | 0.25            |      |             |       |             |       |       |       |             |       | 32           |     |
| 2_GR_12           | 258  | <i>mgrB</i> (N25ΔISKpn26-like <sup>R</sup> ),<br><i>phoP</i> (A95S), <i>phoQ</i> (N253T)     | 8                                   | 0.25            | 64   |             |       |             |       | 64    |       |             |       |              |     |
| 3_GR_13           | 258  | D31E                                                                                         | 8                                   | 0.5-1           |      |             |       |             |       |       |       |             |       |              |     |
| 4_GR_12           | 258  | <i>mgrB</i> (N25ΔISKpn26-like <sup>R</sup> ),<br><i>phoP</i> (P74L), <i>phoQ</i> (N253T)     | 16-32                               | 0.25            | 32   |             |       |             |       | >64   |       |             |       |              |     |
| 5_GR_13           | 383  | <i>mgrB</i> (Q30STOP)                                                                        | 16                                  | 0.25            |      |             |       |             |       |       |       |             |       |              |     |
| 7_GR_13           | 258  | <i>mgrB</i> (N25ΔISKpn26-like <sup>R</sup> )                                                 | 64->64                              | 0.25-0.5        | 64   | 16          | 16    |             | 64    | 32    |       |             | 32    | 64           | >64 |
| 8_GR_13           | 258  | <i>phoQ</i> (G385C)                                                                          | 32-64                               |                 |      |             |       |             | 1-16  |       |       |             |       |              |     |
| 9_GR_12           | 258  | <i>phoQ</i> (T281M)                                                                          | 8-16                                |                 |      |             |       |             | 2-8   |       |       |             |       |              |     |
| 10_GR_13          | 258  | <i>mgrB</i> (N25ΔISKpn26-like <sup>R</sup> ),<br><i>phoQ</i> (N253T)                         | 32-64                               | 0.25            |      |             |       |             |       | 32    |       |             |       |              |     |
| 11_BR_13          | 437  | <i>mgrB</i> (-35ΔISR <sup>F</sup> )                                                          | 64                                  | 0.125           |      |             |       |             |       |       |       |             |       |              |     |
| 12_BR_13          | 11   | <i>mgrB</i> (N25ΔISKpn13 <sup>R</sup> )                                                      | >64                                 | 0.5-2           |      |             |       |             |       |       |       |             |       |              |     |
| 13_GR_14<br>(Het) | 258  | <i>mgrB</i> (N25ΔISKpn26-like <sup>R</sup> ),<br><i>phoQ</i> (V446G), <i>pmrB</i><br>(P158R) | 16                                  | 16              |      |             |       |             |       | >64   |       |             |       | ≤0.06-<br>32 |     |
| 14_GR_14<br>(Het) | 258  | <i>mgrB</i> (N25ΔISKpn26-like <sup>R</sup> ),<br><i>phoQ</i> (V446G), <i>pmrB</i><br>(P158R) | 16-32                               | 0.125-32        |      |             |       |             |       | >64   |       |             |       | ≤0.06-<br>64 |     |
| 15_GR_13          | 258  | <i>mgrB</i> (I45ΔISKpn25 <sup>F</sup> )                                                      | 32-64                               | 2-4             |      |             |       |             |       |       |       |             |       |              |     |
| 16_GR_13          | 11   | <i>mgrB</i> (-19ΔISR-like <sup>F</sup> )                                                     | 64                                  | ≤0.06-<br>0.125 |      |             |       |             |       |       |       |             |       |              |     |
| 17_GR_14          | 11   | <i>mgrB</i> (-19ΔISR-like <sup>F</sup> )                                                     | 32                                  | 0.125           |      |             |       |             |       |       |       |             |       |              |     |
| 18_GR_14          | 258  | <i>mgrB</i> (N25ΔISKpn26-like <sup>R</sup> )                                                 | 64                                  | 1               |      |             |       |             |       |       |       |             |       |              |     |
| 19_GR_14          | 258  | <i>mgrB</i> (C28STOP)                                                                        | 64                                  | 0.25-0.5        |      |             |       |             |       |       |       |             |       |              |     |
| 20_GR_12          | 258  | WT                                                                                           | 0.125-<br>0.25                      | 0.125           | 0.25 | 0.125       | 0.125 |             | 0.125 | 0.125 | 8     | 32          | 0.125 | 0.125        | 0.5 |
| 23_GR_12<br>(Het) | 258  | <i>mgrB</i> (N25ΔISKpn26-like <sup>R</sup> ),<br><i>phoP</i> (A95S), <i>phoQ</i> (N253T)     | 4-8                                 | 0.125           | 8    |             |       |             | 16    |       |       |             |       |              |     |

573

574 <sup>a</sup>Predicted deleterious mutations in genes when compared against polymyxin-susceptible isolate, 20\_GR\_12; represented as *gene*  
575 (change); change defined as initial amino acid, position and new alteration; -, upstream nucleotide position from gene start where first  
576 dissimilarity occurs; <sup>F/R</sup>, IS element in forward (F) or reverse (R) orientation to *mgrB* defined by transposase direction.

577 <sup>b</sup>Minimal inhibitory concentration of PMB before and after complementation with specified WT and mutated genes; -, MIC range as  
578 per at least 2 transformed colonies and tested in duplicate; Susceptible ( $\leq 2$  mg/L); 2 to 8-fold above EUCAST clinical breakpoint;  $\geq 16$ -

579 fold above EUCAST clinical breakpoint

580 (Het), Heterogeneity detected in isolate.

581

582

583

584

585

586

587

588

589

590

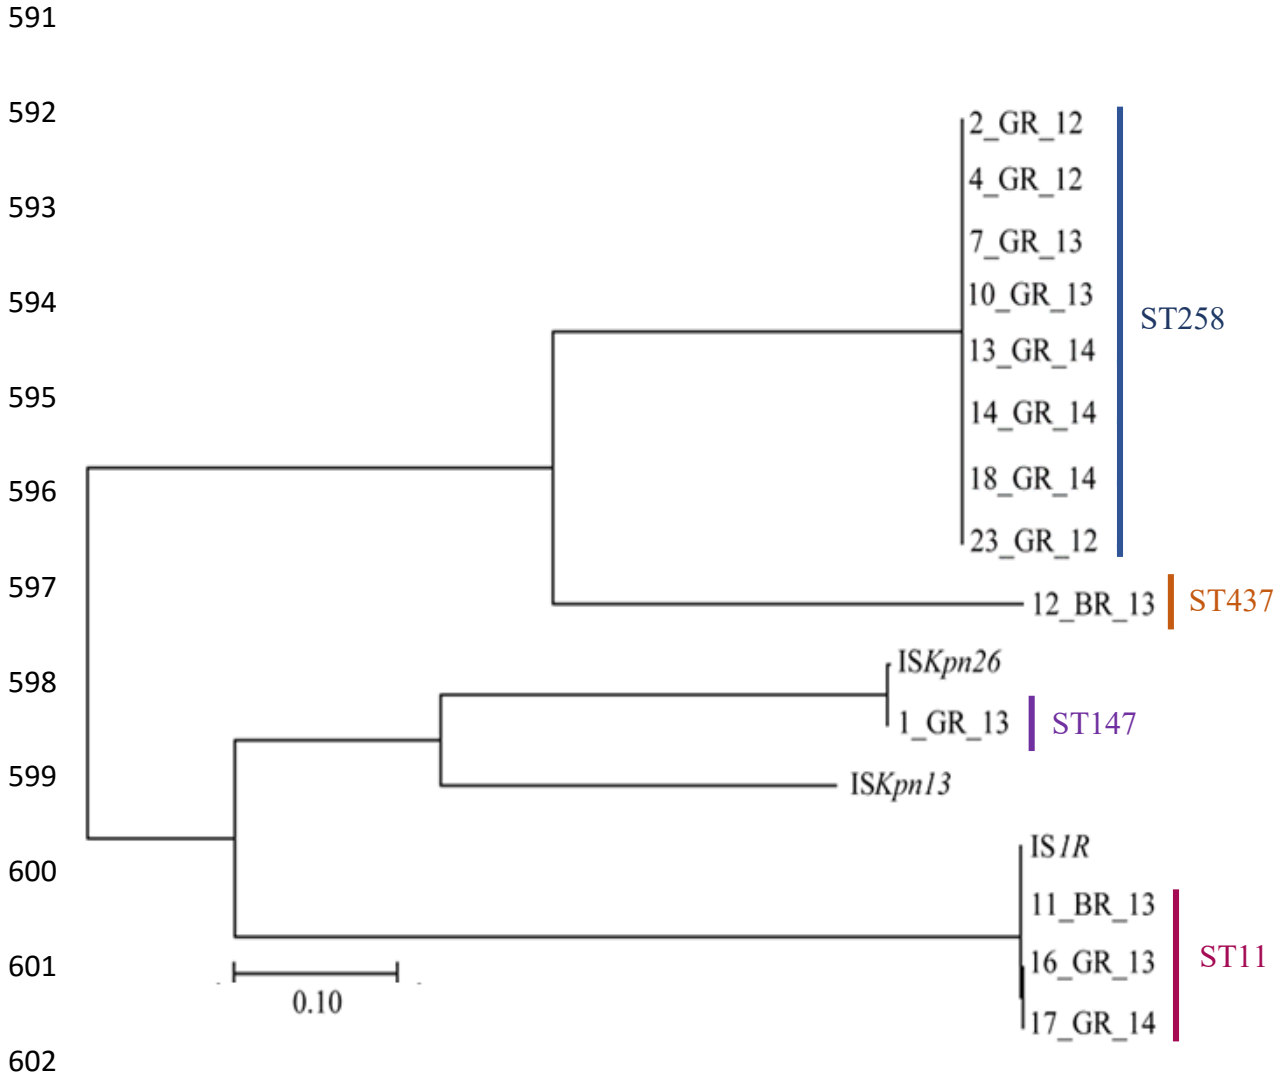

603 **Figure 1.** Clustering of IS elements disrupting *mgrB* detected in clinical strains together with  
604 reference IS element sequences. Neighbour-joining clustering of the IS element amplicon in  
605 relation to reference sequences for *ISKpn13*, *ISKpn26* and *ISIR* with transposase in the forward  
606 orientation. Scale represents number of base substitutions per site.

607

608

609
